# Supplementary material for: Gender Dimorphism in Aspartame-Induced Impairment of Spatial Cognition and Insulin Sensitivity
Source: PLoS One. 2012 Apr 3;7(4):e31570. doi: 10.1371/journal.pone.0031570 (PMC3317920; doi:10.1371/journal.pone.0031570)
Supplement: Table S1 — Correlations between body characteristics and spatial memory variables in the MWM test. (PDF) [file pone.0031570.s001.pdf]

Supplementary Table. S1

|                          | Body Weight (6 wks) | Body Weight (17wks) | Weight Gain (%) | Fasting Insulin (uIU/ml) | HOMA-IR  | Fasting glucose mM | T-CHOL (mg/dL) | TG (mg/dL) | HDL-C (mg/dL) | LDL (mg/dL) | Visceral Fat (g) | Latency (s) |         |         |         |            | Thigmotaxis time (%) |          |          |          |            | Floating Time (%) |          |          |          |            | Time in Target Quadrants (%) |           |          |         |            | Platform Crosses |           |         |         |            | Annulus Crossing Index |           |          |         |            | Mean Distance to goal (m) |          |          |          |            |  |  |  |
|--------------------------|---------------------|---------------------|-----------------|--------------------------|----------|--------------------|----------------|------------|---------------|-------------|------------------|-------------|---------|---------|---------|------------|----------------------|----------|----------|----------|------------|-------------------|----------|----------|----------|------------|------------------------------|-----------|----------|---------|------------|------------------|-----------|---------|---------|------------|------------------------|-----------|----------|---------|------------|---------------------------|----------|----------|----------|------------|--|--|--|
|                          |                     |                     |                 |                          |          |                    |                |            |               |             |                  | Day 1       | Day 2   | Day 3   | Day 4   | Probe Test | Day 1                | Day 2    | Day 3    | Day 4    | Probe Test | Day 1             | Day 2    | Day 3    | Day 4    | Probe Test | Day 1                        | Day 2     | Day 3    | Day 4   | Probe Test | Day 1            | Day 2     | Day 3   | Day 4   | Probe Test | Day 1                  | Day 2     | Day 3    | Day 4   | Probe Test | Day 1                     | Day 2    | Day 3    | Day 4    | Probe Test |  |  |  |
| Body Weight (6 weeks)    | 1                   | 0.888***            | 0.172           | 0.584***                 | 0.638*** | 0.203              | -0.168         | -0.015     | 0.625***      | -0.649***   | 0.372**          | 0.136       | -0.136  | -0.042  | 0.003   | -0.025     | 0.024                | -0.018   | 0.144    | 0.272    | 0.270      | 0.159             | -0.006   | 0.033    | -0.017   | 0.095      | 0.179                        | -0.137    | -0.122   | -0.249  | 0.229      | -0.083           | 0.184     | 0.075   | -0.180  | 0.000      | -0.235                 | 0.115     | -0.036   | -0.171  | 0.085      | -0.083                    | 0.084    | 0.124    | 0.293*   | -0.139     |  |  |  |
| Body Weight (17 weeks)   | 0.888***            | 1                   | 0.605***        | 0.654***                 | 0.796*** | 0.370**            | -0.093         | -0.109     | 0.612***      | -0.590***   | 0.446**          | 0.132       | -0.092  | 0.075   | 0.029   | 0.076      | 0.137                | 0.113    | 0.263    | 0.291*   | 0.211      | 0.046             | -0.052   | 0.062    | 0.054    | 0.188      | 0.075                        | -0.224    | -0.162   | -0.243  | 0.160      | -0.109           | 0.130     | 0.002   | -0.193  | -0.120     | -0.192                 | 0.067     | -0.118   | -0.199  | -0.027     | 0.007                     | 0.217    | 0.218    | 0.345**  | -0.067     |  |  |  |
| Weight Gain (%)          | 0.172               | 0.605***            | 1               | 0.371**                  | 0.584*** | 0.440**            | 0.104          | -0.216     | 0.236         | -0.144      | 0.322*           | 0.056       | 0.027   | 0.232   | 0.063   | 0.211      | 0.256                | 0.290*   | 0.327*   | 0.163    | -0.010     | -0.157            | -0.103   | 0.086    | 0.162    | 0.258      | -0.164                       | -0.245    | -0.137   | -0.085  | -0.054     | -0.092           | -0.028    | -0.122  | -0.100  | -0.265     | -0.009                 | -0.042    | -0.188   | -0.133  | -0.213     | 0.172                     | 0.324*   | 0.268    | 0.234    | 0.106      |  |  |  |
| Fasting Insulin (uIU/ml) | 0.584***            | 0.654***            | 0.371**         | 1                        | 0.821*** | -0.095             | -0.300*        | -0.021     | 0.274         | -0.336*     | 0.042            | 0.021       | 0.095   | 0.023   | -0.076  | 0.017      | 0.106                | 0.085    | 0.002    | 0.046    | 0.001      | -0.115            | -0.134   | -0.224   | -0.128   | -0.077     | 0.136                        | -0.361*   | -0.135   | -0.193  | -0.057     | -0.070           | -0.020    | 0.094   | -0.187  | 0.023      | -0.133                 | -0.035    | -0.051   | -0.173  | -0.004     | -0.014                    | 0.301*   | 0.080    | 0.135    | -0.002     |  |  |  |
| HOMA-IR                  | 0.638***            | 0.796***            | 0.584***        | 0.821***                 | 1        | 0.468**            | -0.157         | -0.100     | 0.363*        | -0.365*     | 0.288*           | 0.064       | 0.132   | 0.148   | 0.010   | 0.150      | 0.157                | 0.195    | 0.255    | 0.240    | 0.133      | -0.089            | 0.005    | 0.006    | 0.076    | 0.177      | -0.024                       | -0.355*   | -0.121   | -0.329* | -0.055     | -0.160           | -0.034    | -0.051  | -0.136  | -0.080     | -0.212                 | -0.083    | -0.131   | -0.125  | -0.052     | 0.069                     | 0.333*   | 0.207    | 0.378**  | 0.079      |  |  |  |
| Fasting glucose mM       | 0.203               | 0.370**             | 0.440**         | -0.095                   | 0.468*** | 1                  | 0.139          | -0.209     | 0.121         | -0.024      | 0.403**          | 0.033       | 0.050   | 0.246   | 0.124   | 0.207      | 0.111                | 0.187    | 0.409**  | 0.396**  | 0.259      | -0.045            | 0.174    | 0.368**  | 0.349*   | 0.433**    | -0.234                       | -0.078    | -0.021   | -0.302* | -0.002     | -0.137           | -0.010    | -0.260  | 0.053   | -0.157     | -0.165                 | -0.106    | -0.182   | 0.060   | -0.074     | 0.122                     | 0.108    | 0.225    | 0.462**  | 0.136      |  |  |  |
| T-CHOL (mg/dL)           | -0.168              | -0.093              | 0.104           | -0.300*                  | -0.157   | 0.139              | 1              | -0.021     | 0.233         | 0.025       | -0.058           | 0.117       | 0.242   | 0.191   | 0.195   | -0.116     | -0.014               | 0.097    | 0.206    | 0.048    | 0.061      | 0.096             | 0.111    | 0.278*   | 0.214    | 0.202      | -0.164                       | -0.188    | -0.056   | 0.167   | -0.114     | -0.115           | -0.387**  | -0.160  | -0.163  | -0.005     | -0.004                 | -0.201    | -0.030   | -0.161  | 0.048      | 0.123                     | 0.182    | 0.181    | -0.013   | 0.145      |  |  |  |
| TG (mg/dL)               | -0.015              | -0.109              | -0.216          | -0.021                   | -0.100   | -0.209             | -0.021         | 1          | 0.020         | -0.311*     | -0.131           | -0.130      | 0.066   | -0.069  | -0.077  | -0.206     | 0.018                | -0.011   | -0.022   | -0.210   | -0.028     | -0.015            | -0.015   | -0.161   | -0.240   | -0.125     | 0.122                        | -0.116    | -0.030   | -0.105  | 0.003      | 0.162            | -0.026    | 0.104   | -0.013  | 0.005      | 0.214                  | -0.103    | 0.083    | -0.011  | 0.015      | -0.137                    | 0.119    | -0.007   | -0.059   | -0.040     |  |  |  |
| HDL-C (mg/dL)            | 0.625***            | 0.612***            | 0.236           | 0.274                    | 0.363*   | 0.121              | 0.233          | 0.020      | 1             | -0.926***   | -0.003           | 0.189       | -0.054  | -0.065  | -0.070  | -0.257     | -0.080               | 0.053    | 0.169    | 0.094    | 0.123      | 0.088             | -0.074   | -0.045   | -0.035   | 0.012      | 0.158                        | -0.102    | 0.037    | 0.024   | 0.347*     | -0.113           | 0.034     | 0.079   | -0.192  | 0.223      | -0.205                 | -0.018    | 0.042    | -0.118  | 0.317*     | -0.106                    | 0.091    | 0.036    | 0.036    | -0.252     |  |  |  |
| LDL (mg/dL)              | -0.649***           | -0.590***           | -0.144          | -0.336*                  | -0.365*  | -0.024             | 0.025          | -0.311*    | -0.926***     | 1           | 0.026            | -0.118      | 0.094   | 0.130   | 0.139   | 0.281*     | 0.070                | -0.025   | -0.108   | -0.020   | -0.097     | -0.058            | 0.104    | 0.158    | 0.156    | 0.074      | -0.230                       | 0.086     | -0.041   | 0.048   | -0.368*    | 0.036            | -0.122    | -0.146  | 0.151   | -0.221     | 0.139                  | -0.003    | -0.073   | 0.079   | -0.303*    | 0.173                     | -0.078   | 0.012    | -0.022   | 0.294*     |  |  |  |
| Visceral Fat (g)         | 0.372**             | 0.446**             | 0.322*          | 0.042                    | 0.288*   | 0.403**            | -0.058         | -0.131     | -0.003        | 0.026       | 1                | 0.122       | 0.005   | 0.357*  | 0.428** | 0.431**    | 0.129                | 0.265    | 0.48***  | 0.553*** | 0.356*     | 0.402**           | 0.340*   | 0.487*** | 0.441**  | 0.457**    | -0.284*                      | -0.188    | -0.349*  | -0.294* | -0.134     | -0.088           | 0.071     | -0.369* | -0.244  | -0.401**   | -0.103                 | 0.137     | -0.384** | -0.275* | -0.359*    | 0.216                     | 0.229    | 0.449**  | 0.521*** | 0.320*     |  |  |  |
| Latency (s)              |                     |                     |                 |                          |          |                    |                |            |               |             |                  |             |         |         |         |            |                      |          |          |          |            |                   |          |          |          |            |                              |           |          |         |            |                  |           |         |         |            |                        |           |          |         |            |                           |          |          |          |            |  |  |  |
| Day 1                    | 0.136               | 0.132               | 0.056           | 0.021                    | 0.064    | 0.033              | 0.117          | -0.130     | 0.189         | -0.118      | 0.122            | 1           | 0.398** | 0.389** | 0.218   | 0.066      | 0.540***             | 0.451**  | 0.485*** | 0.401**  | 0.404**    | 0.271             | 0.390**  | 0.192    | 0.303*   | 0.332*     | -0.479***                    | -0.256    | -0.412** | -0.105  | -0.252     | -0.882***        | -0.274    | -0.341* | -0.278* | -0.062     | -0.800***              | -0.092    | -0.352*  | -0.216  | 0.019      | 0.617***                  | 0.453**  | 0.574*** | 0.344*   | 0.380**    |  |  |  |
| Day 2                    | -0.136              | -0.092              | 0.027           | 0.095                    | 0.132    | 0.050              | 0.242          | 0.066      | -0.054        | 0.094       | 0.005            | 0.398**     | 1       | 0.313*  | 0.332*  | 0.131      | 0.374**              | 0.568*** | 0.254    | 0.256    | 0.257      | 0.058             | 0.521*** | 0.344*   | 0.363*   | 0.313*     | -0.433**                     | -0.449**  | -0.205   | -0.122  | -0.328*    | -0.393**         | -0.720*** | -0.334* | -0.247  | -0.108     | -0.288*                | -0.698*** | -0.217   | -0.218  | -0.104     | 0.460**                   | 0.599*** | 0.313*   | 0.222    | 0.423**    |  |  |  |
| Day 3                    | -0.042              | 0.075               | 0.232           | 0.023                    | 0.148    | 0.246              | 0.191          | -0.069     | -0.065        | 0.130       | 0.357*           | 0.388**     | 0.313*  | 1       | 0.363*  | 0.320*     | 0.325*               | 0.451**  | 0.679*** | 0.558*** | 0.481***   | 0.115             | 0.308*   | 0.582*** | 0.566*** | 0.507***   | -0.424**                     | -0.606*** | -0.274   | -0.441* | -0.375**   | -0.348*          | -0.880*** | -0.181  | -0.363* | -0.33      |                        |           |          |         |            |                           |          |          |          |            |  |  |  |
